# Supplementary material for: A Genome-Wide Association Study of Upper Aerodigestive Tract Cancers Conducted within the INHANCE Consortium
Source: PLOS journal article supplement (doi:10.1371/journal.pgen.1001333), 2011-03-17
Supplement: S5 (10.1371/journal.pgen.1001333.s005) [file journal.pgen.1001333.s005]

**Supplementary Table 2. Sensitivity analysis on the top variants identified by the Genome-wide analysis.**

OR: Odds ratio, p-val: two-sided p-value corresponding to the OR
- Overall: original GWAS

- Exclusion of kidney cases: original GWAS excluding the kidney cases

- Adjusted for eigenvectors: original GWAS adjusted using eigenvectors informative for population structure

The potential for population stratification (PCA) not accounted by adjustment by country of recruitment was also investigated by principal components analysis undertaken with the EIGENSTRAT package using 12,898 markers in low LD. Adjustment for population stratification using the PCA was performed by including significant eigenvectors as covariates in the logistic regression.

- Exclusion of generic controls: original GWAS excluding all generic controls variants
